# Supplementary material
Source: MDPI journal article supplement (https://www.mdpi.com/2073-4441/14/7/1088)
Supplement: s1 [file s1]

# A Hybrid Data-Driven-Agent-Based Modelling Framework for Water Distribution Systems Contamination Response during COVID-19

Leonid Kadinski, Camilo Salcedo, Dominic L. Boccelli, Emily Berglund and Avi Ostfeld

## Supplementary Material

**Table S1.** Relevant Social Background Characteristics of Consumer Agents Divided into Three Society Types and the Distribution in Every Society Type.

| Social Background      | Type 1 | Type 2 | Type 3 |
|------------------------|--------|--------|--------|
| Gender                 |        | %      |        |
| Male                   | 47.1   | 47.1   | 47.1   |
| Female                 | 52.9   | 52.9   | 52.9   |
| Age                    | NA     | NA     | NA     |
| 0–12                   | 11.7   | 10.5   | 9.5    |
| 12–21                  | 12.5   | 11.6   | 7.4    |
| 21–30                  | 8.6    | 10.9   | 11.9   |
| 30–40                  | 13.4   | 15.7   | 19.3   |
| 40–49                  | 18.4   | 21.8   | 23.8   |
| 49–59                  | 12.1   | 13     | 14.7   |
| 59–70                  | 13.3   | 9      | 9.8    |
| 70–85                  | 10     | 7.5    | 3.6    |
| Parent status          | NA     | NA     | NA     |
| Child < 16             | 25.6   | 22     | 16.4   |
| Child > 16             | 57     | 54.3   | 43.9   |
| No children            | 17.4   | 23.7   | 39.7   |
| Marital status         | NA     | NA     | NA     |
| Single                 | 21     | 25.1   | 30.9   |
| Married                | 73.3   | 68.9   | 62.7   |
| Divorced/separated     | 5.7    | 6      | 6.4    |
| Household size         | NA     | NA     | NA     |
| ≥ 6                    | 9      | 8.3    | 7      |
| 3–5                    | 77.6   | 80.6   | 83.6   |
| 2                      | 11.9   | 10.6   | 7.5    |
| 1                      | 1.5    | 0.5    | 1.9    |
| Employment status      | NA     | NA     | NA     |
| Unemployed             | 10.3   | 5      | 1.2    |
| Retired                | 8.5    | 5.1    | 4.3    |
| Student                | 26.3   | 27.3   | 36.7   |
| Employed               | 54.9   | 62.6   | 57.8   |
| Educational attainment | NA     | NA     | NA     |
| None                   | 1.3    | 0.7    | 0.1    |
| Primary school         | 6.7    | 3.1    | 0.2    |
| Lower secondary school | 21.5   | 15     | 2.3    |
| Upper secondary school | 50.6   | 55     | 22     |
| University—bachelors   | 14.3   | 17.2   | 33.3   |
| University—masters     | 5.4    | 8.2    | 38.5   |
| University—doctorate   | 0.2    | 0.8    | 3.6    |

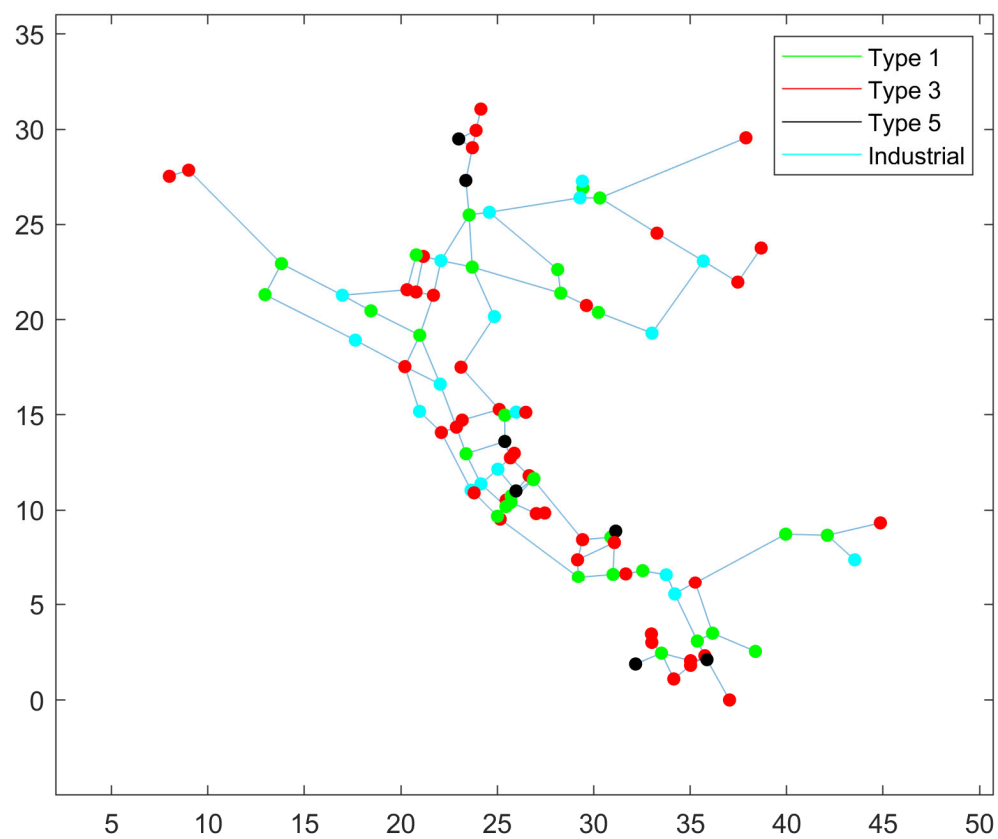

**Figure S1.** Distribution of three society types, including industrial and facility nodes in the EPANET example application network, Net3.
